# Supplementary material for: Optimization Method for Phenolic Compounds Extraction from Medicinal Plant (Juniperus procera) and Phytochemicals Screening
Source: MDPI journal article supplement (doi:10.3390/molecules26247454), 2021-12-09
Supplement: s1 [file s1]

# Optimization method for phenolic compounds extraction from medicinal plant (*Juniperus procera*) and phytochemicals screening

Abdalrhman M. Salih<sup>1\*</sup>, Fahad Al-Qurainy<sup>1</sup>, Mohammad Nadeem<sup>1</sup>, Mohamed Tarroum<sup>1</sup>, Salim Khan<sup>1</sup> Hassan O. Shaikhaldein<sup>1</sup>, Abdulrahman Al-hashimi<sup>1</sup>, and Alanoud Alfagham<sup>1</sup> & Jawaher Alkahtani<sup>1</sup>

<sup>1</sup> Botany and Microbiology Department, College of Science King Saud University, P. O. BOX 2455, Riyadh 11451, Saudi Arabia

\* Correspondence: abdalrahmanm@gmail.com

Abdalrhman M. Salih has contributed significantly to this work

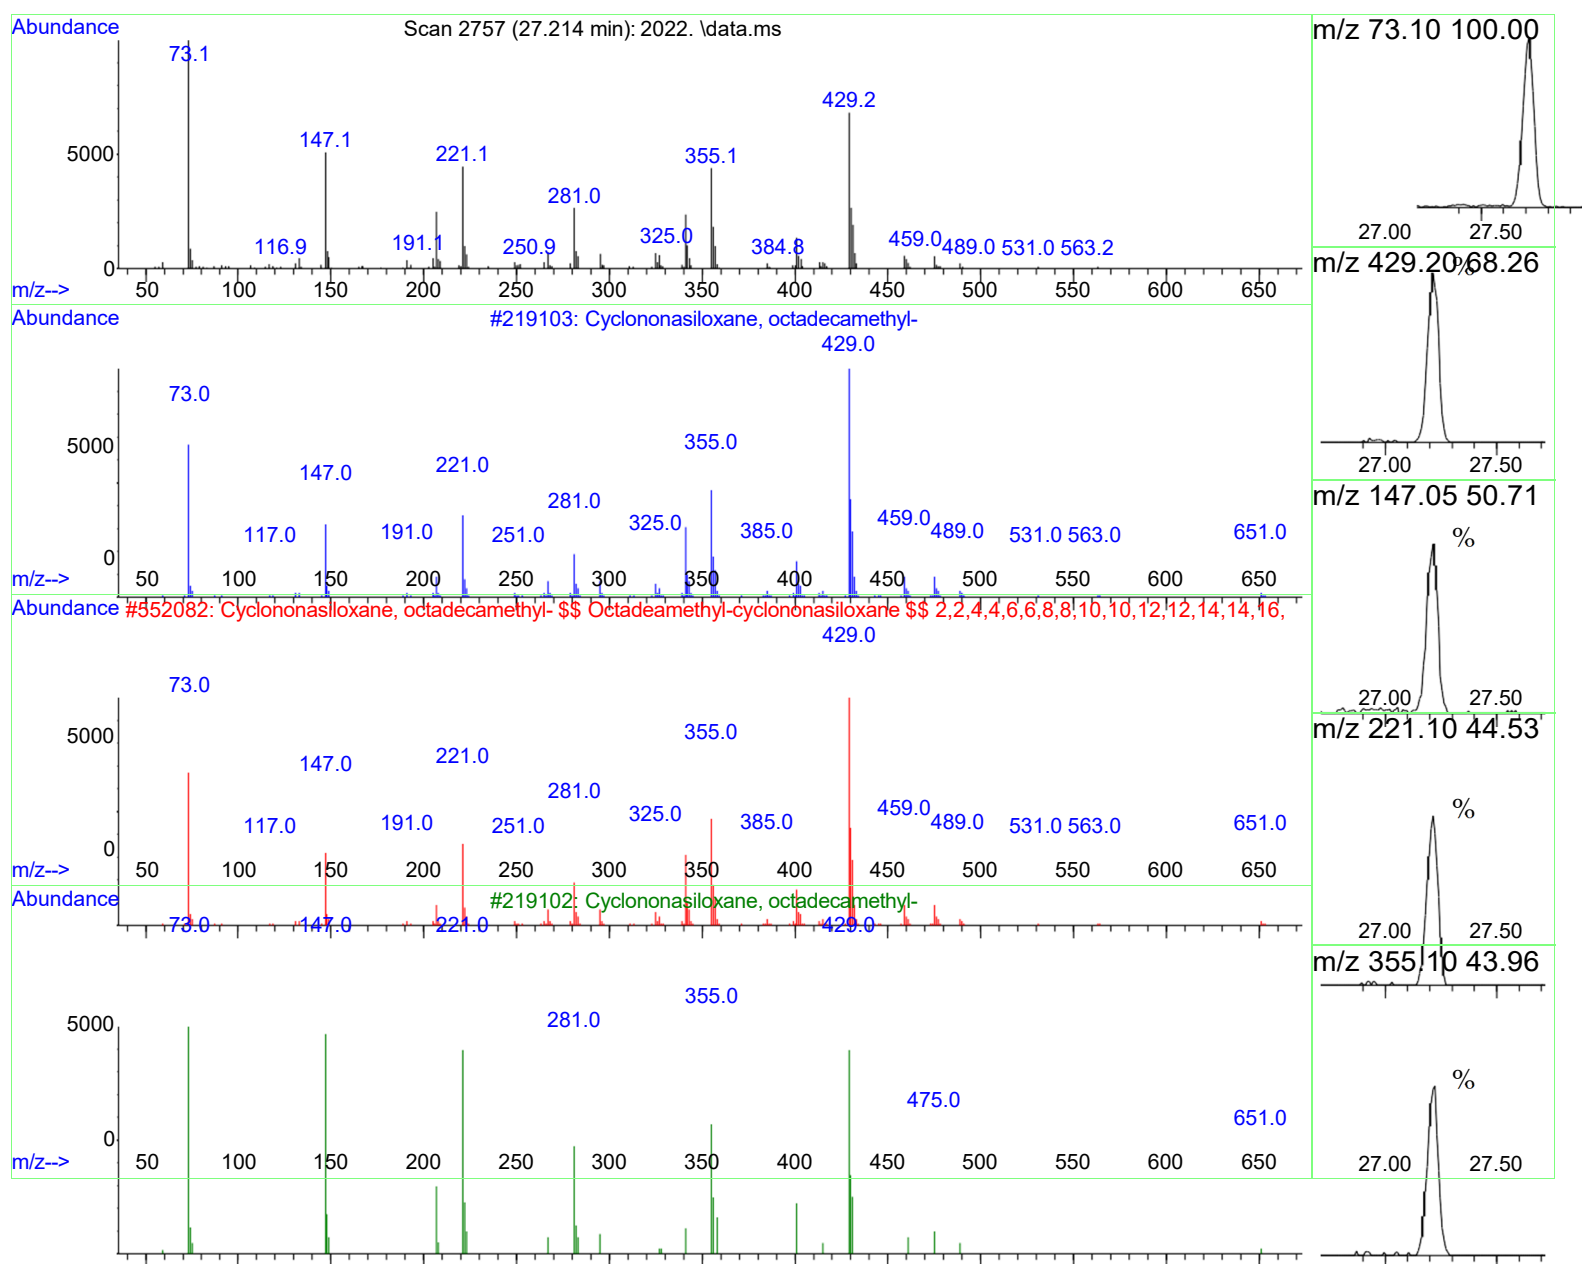

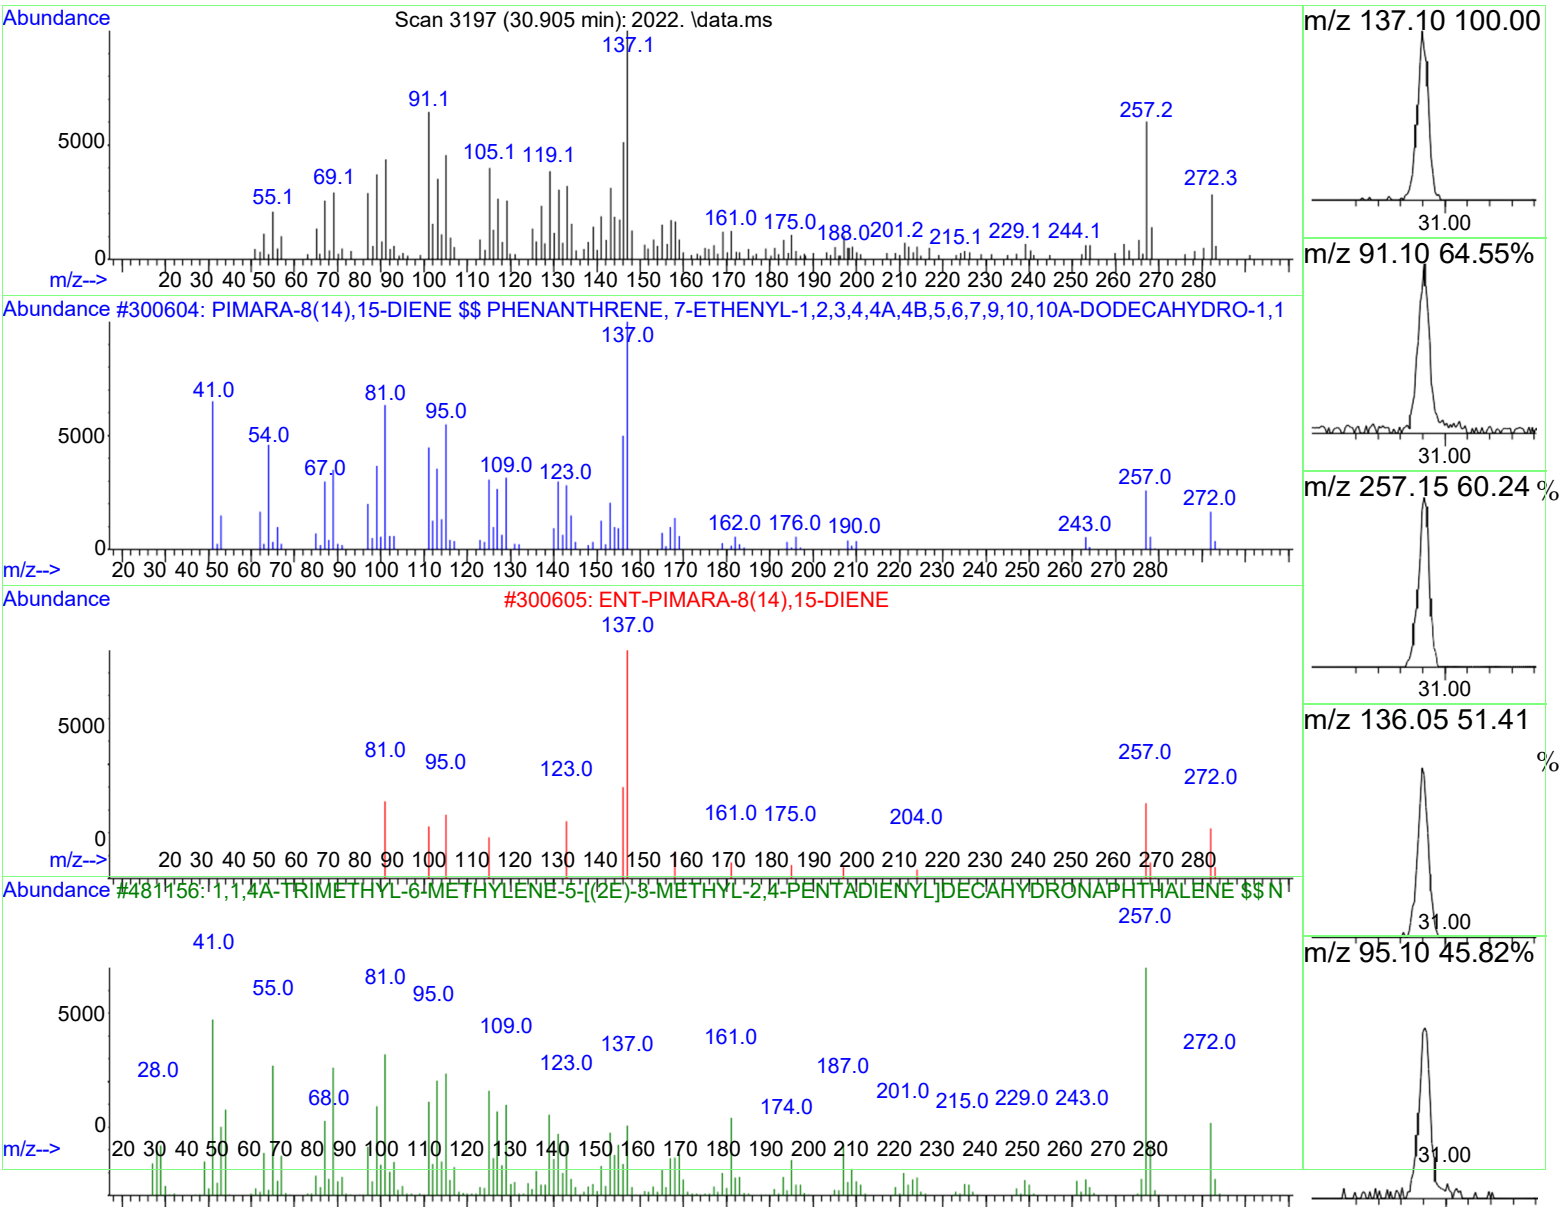

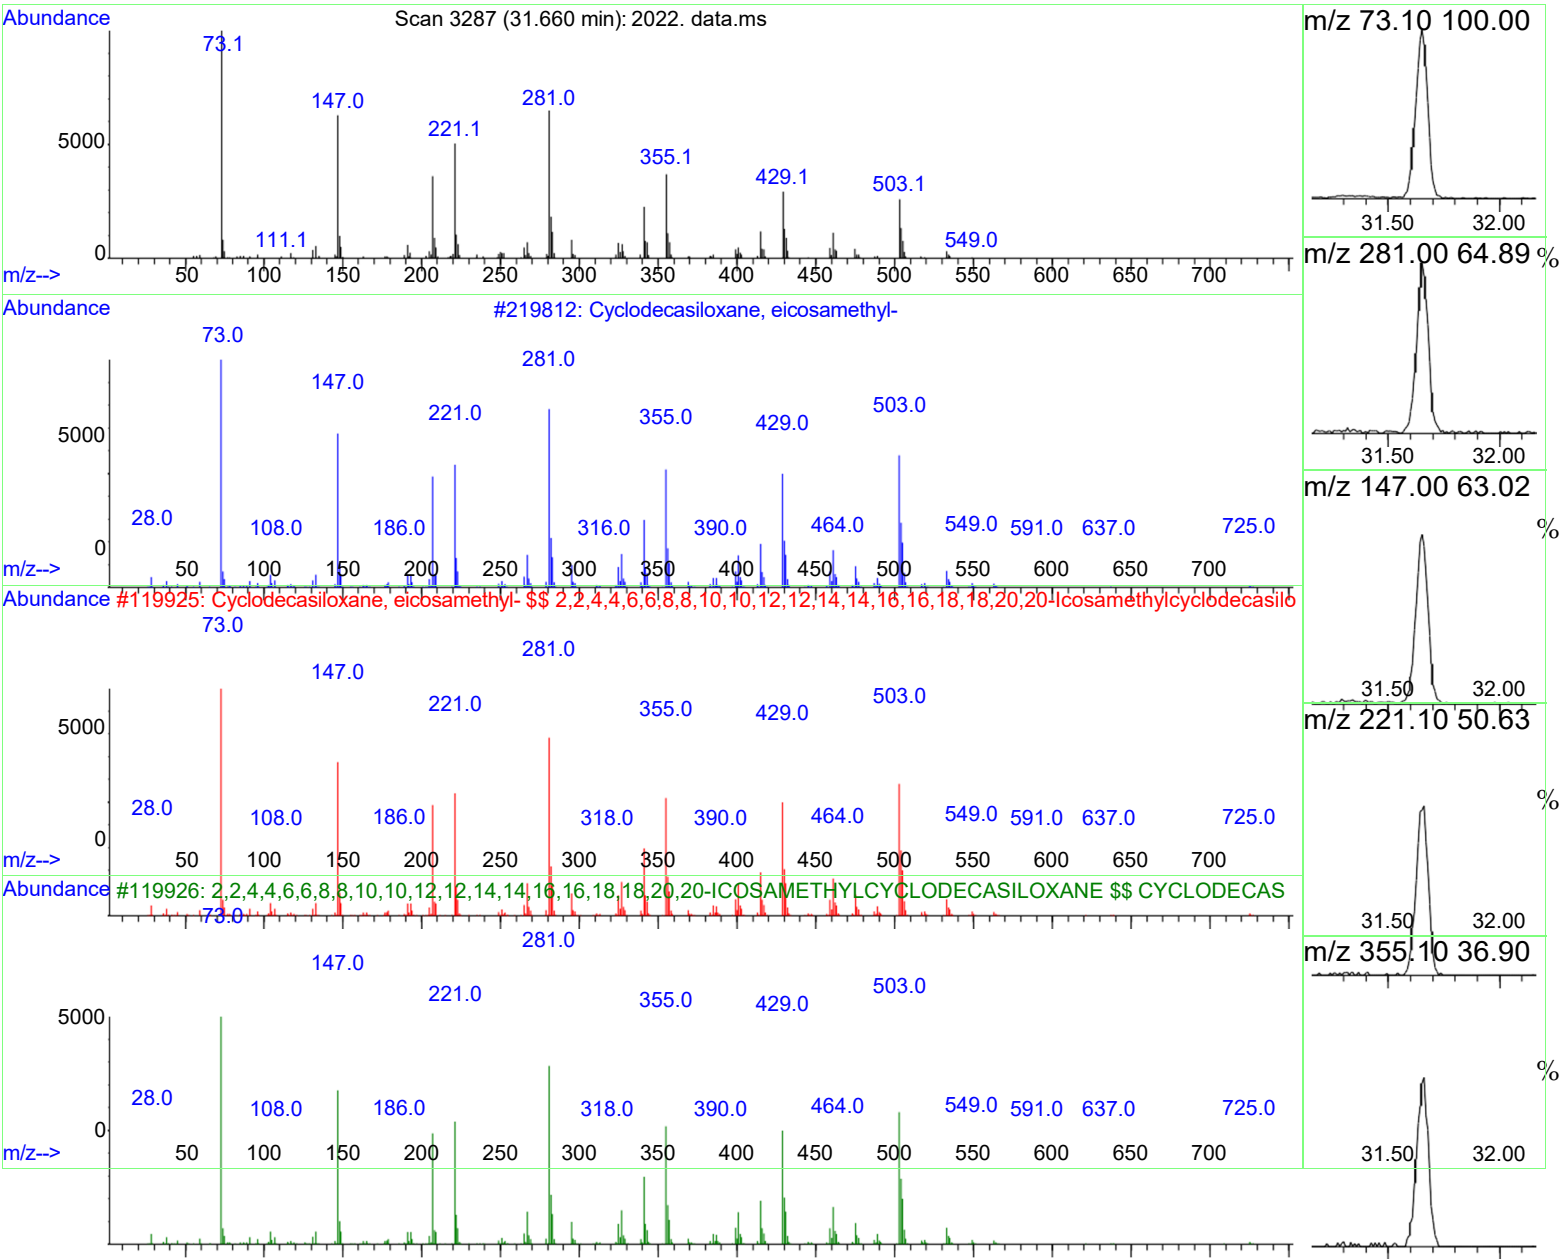

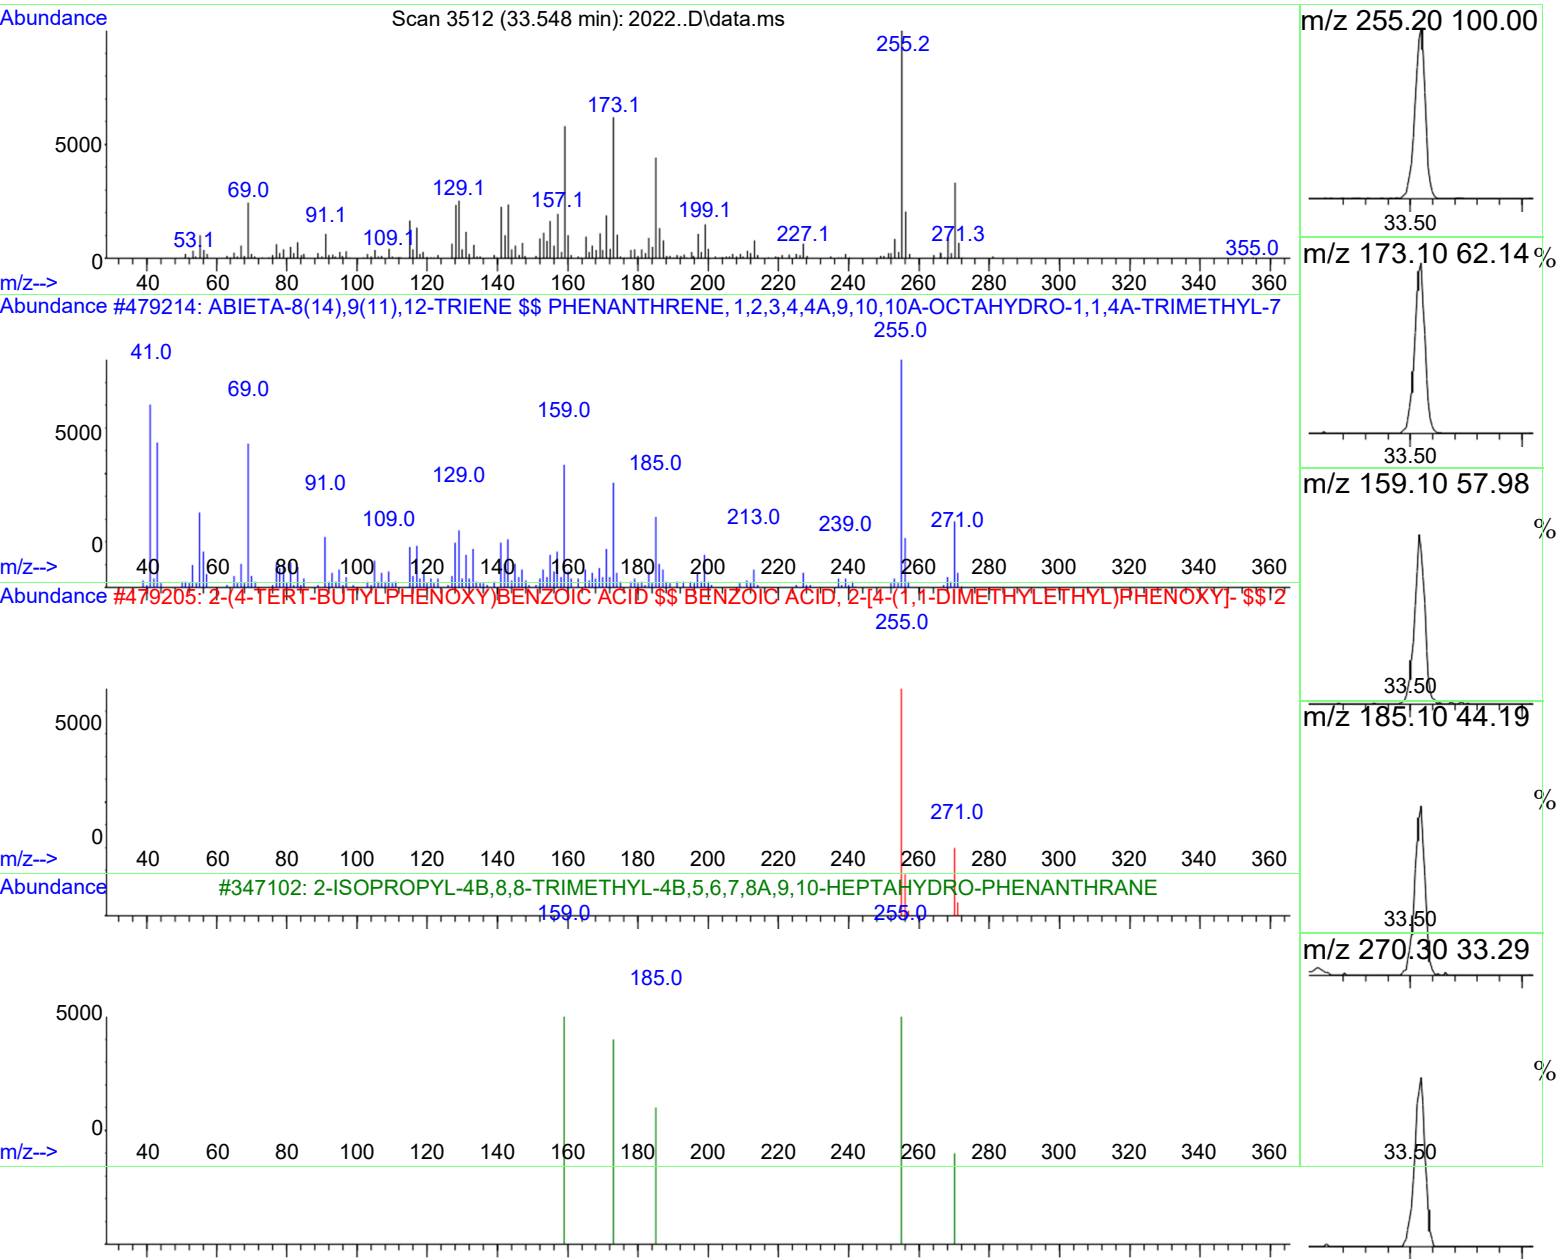

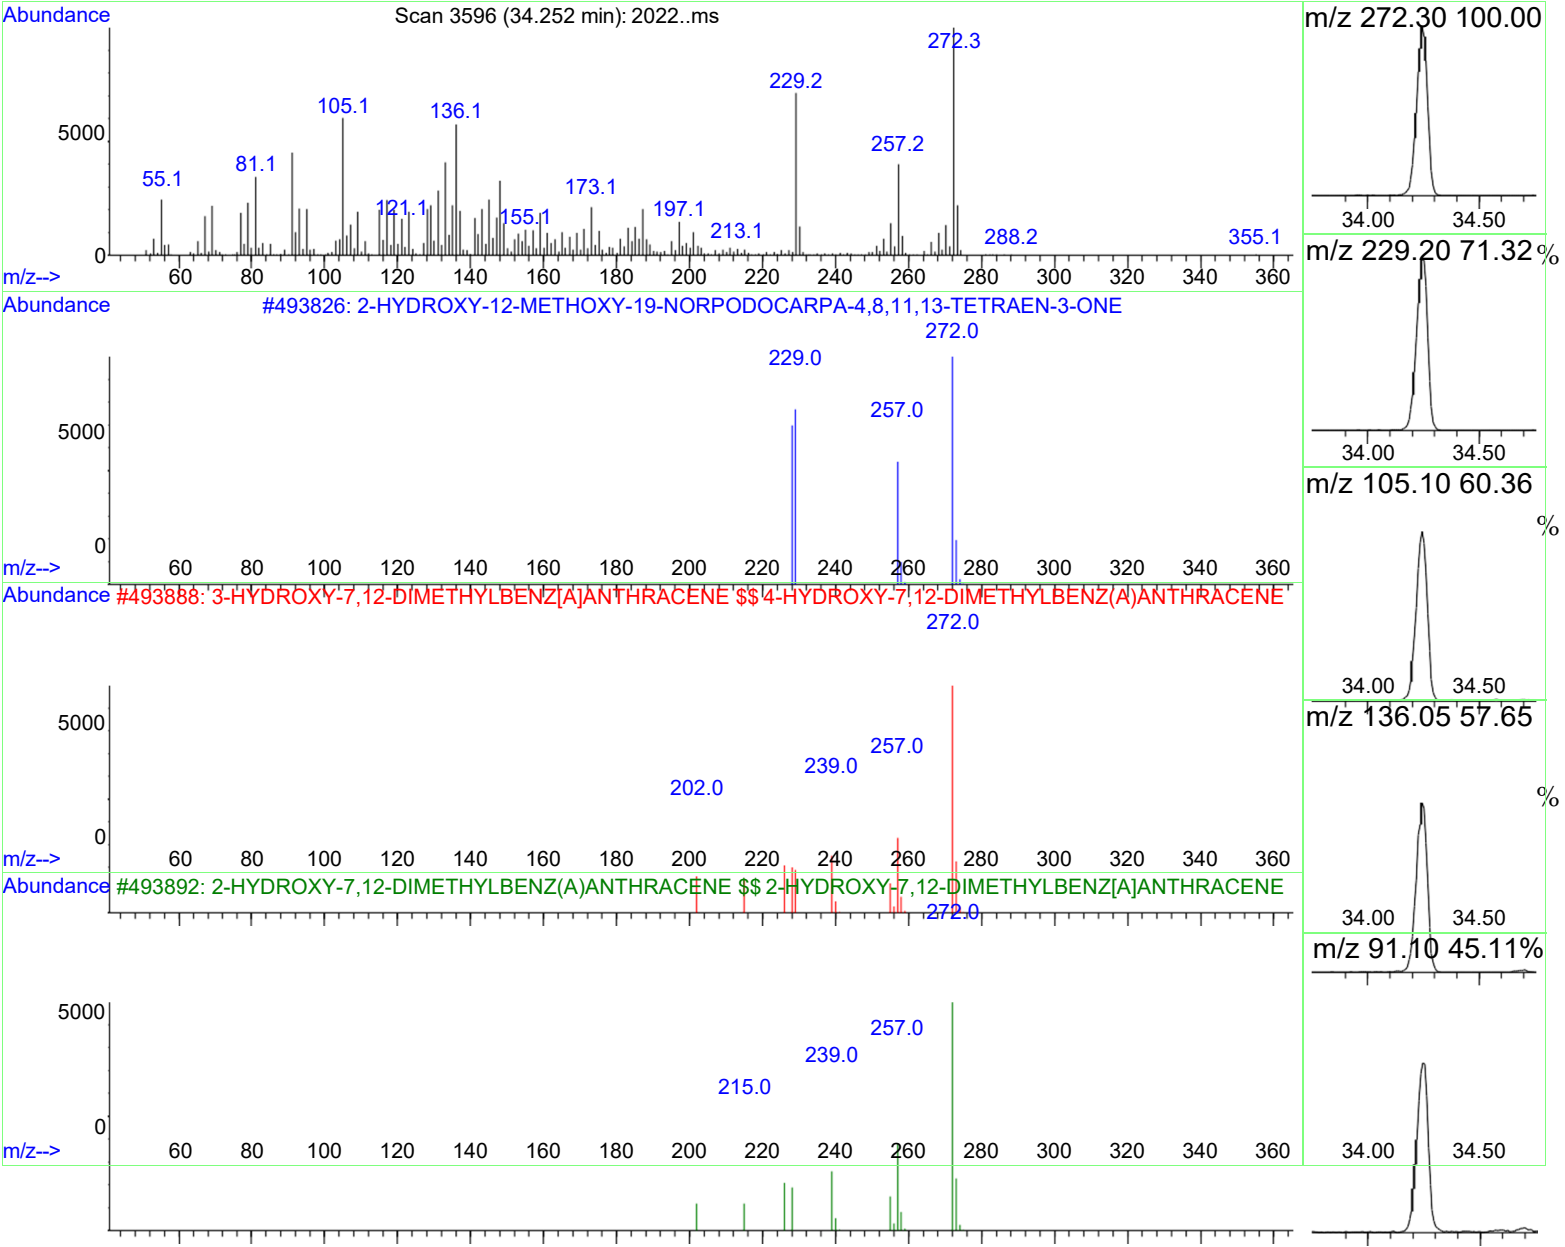

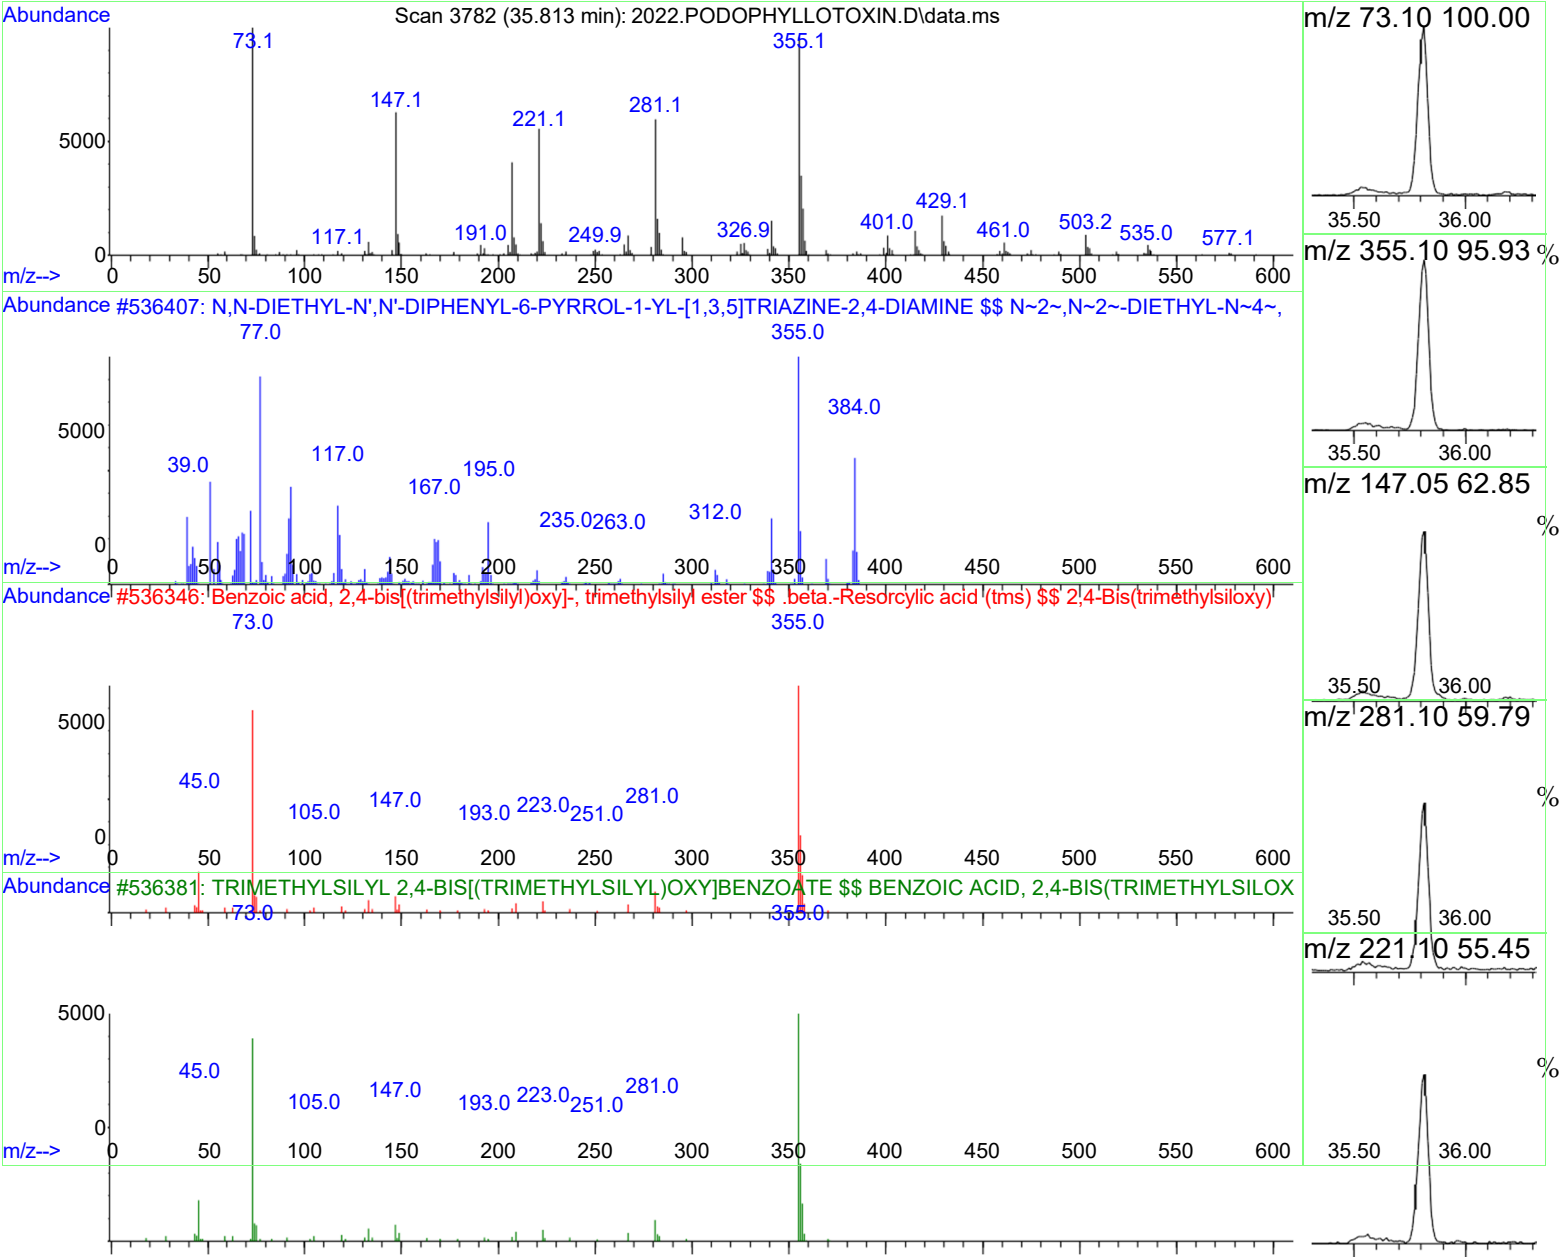

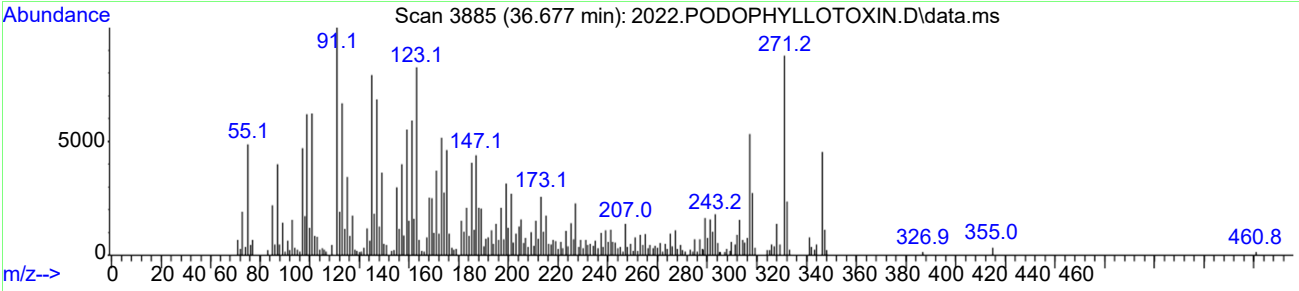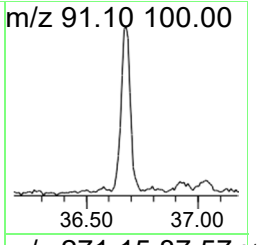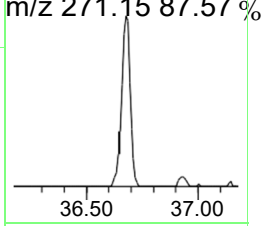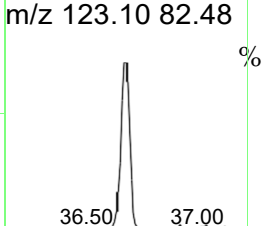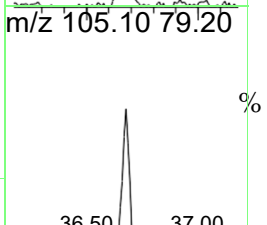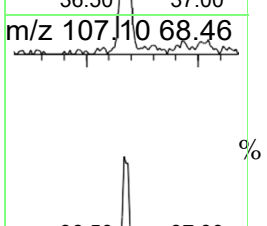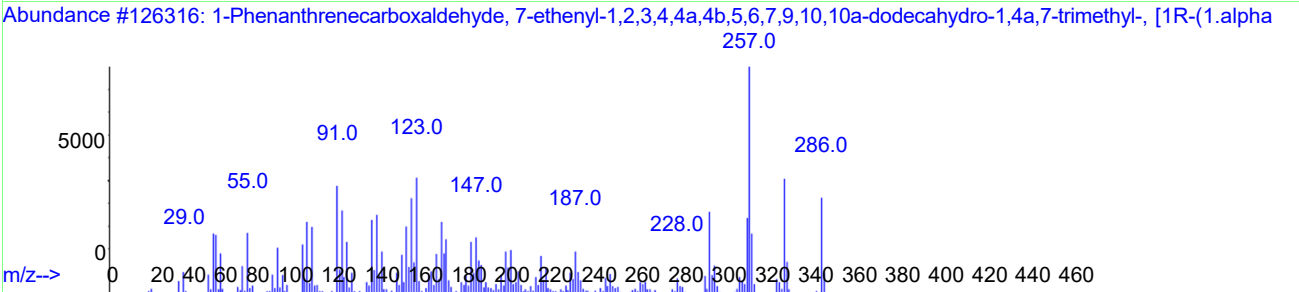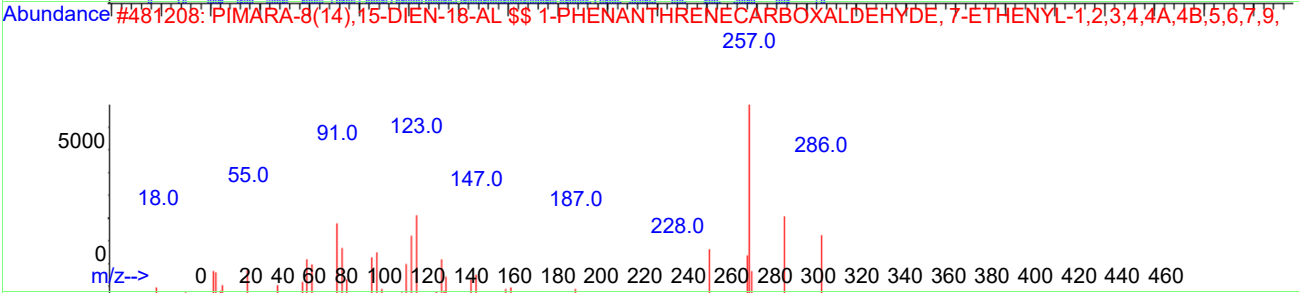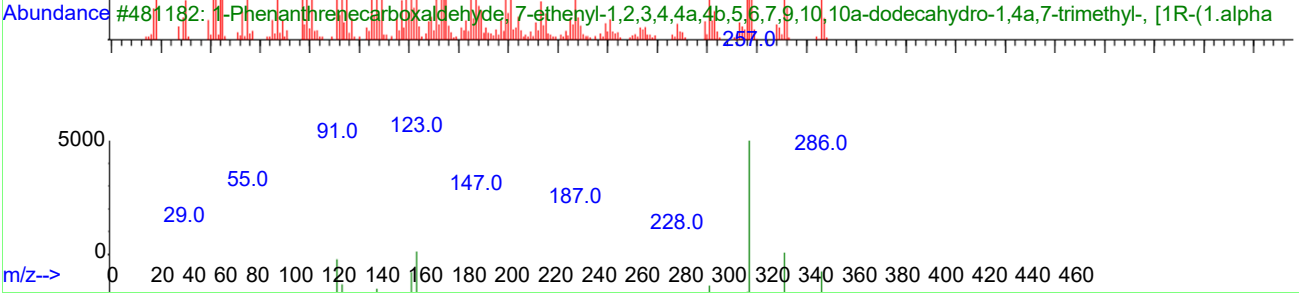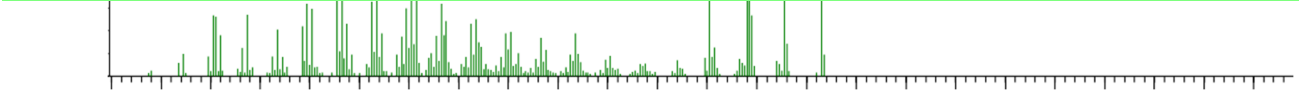

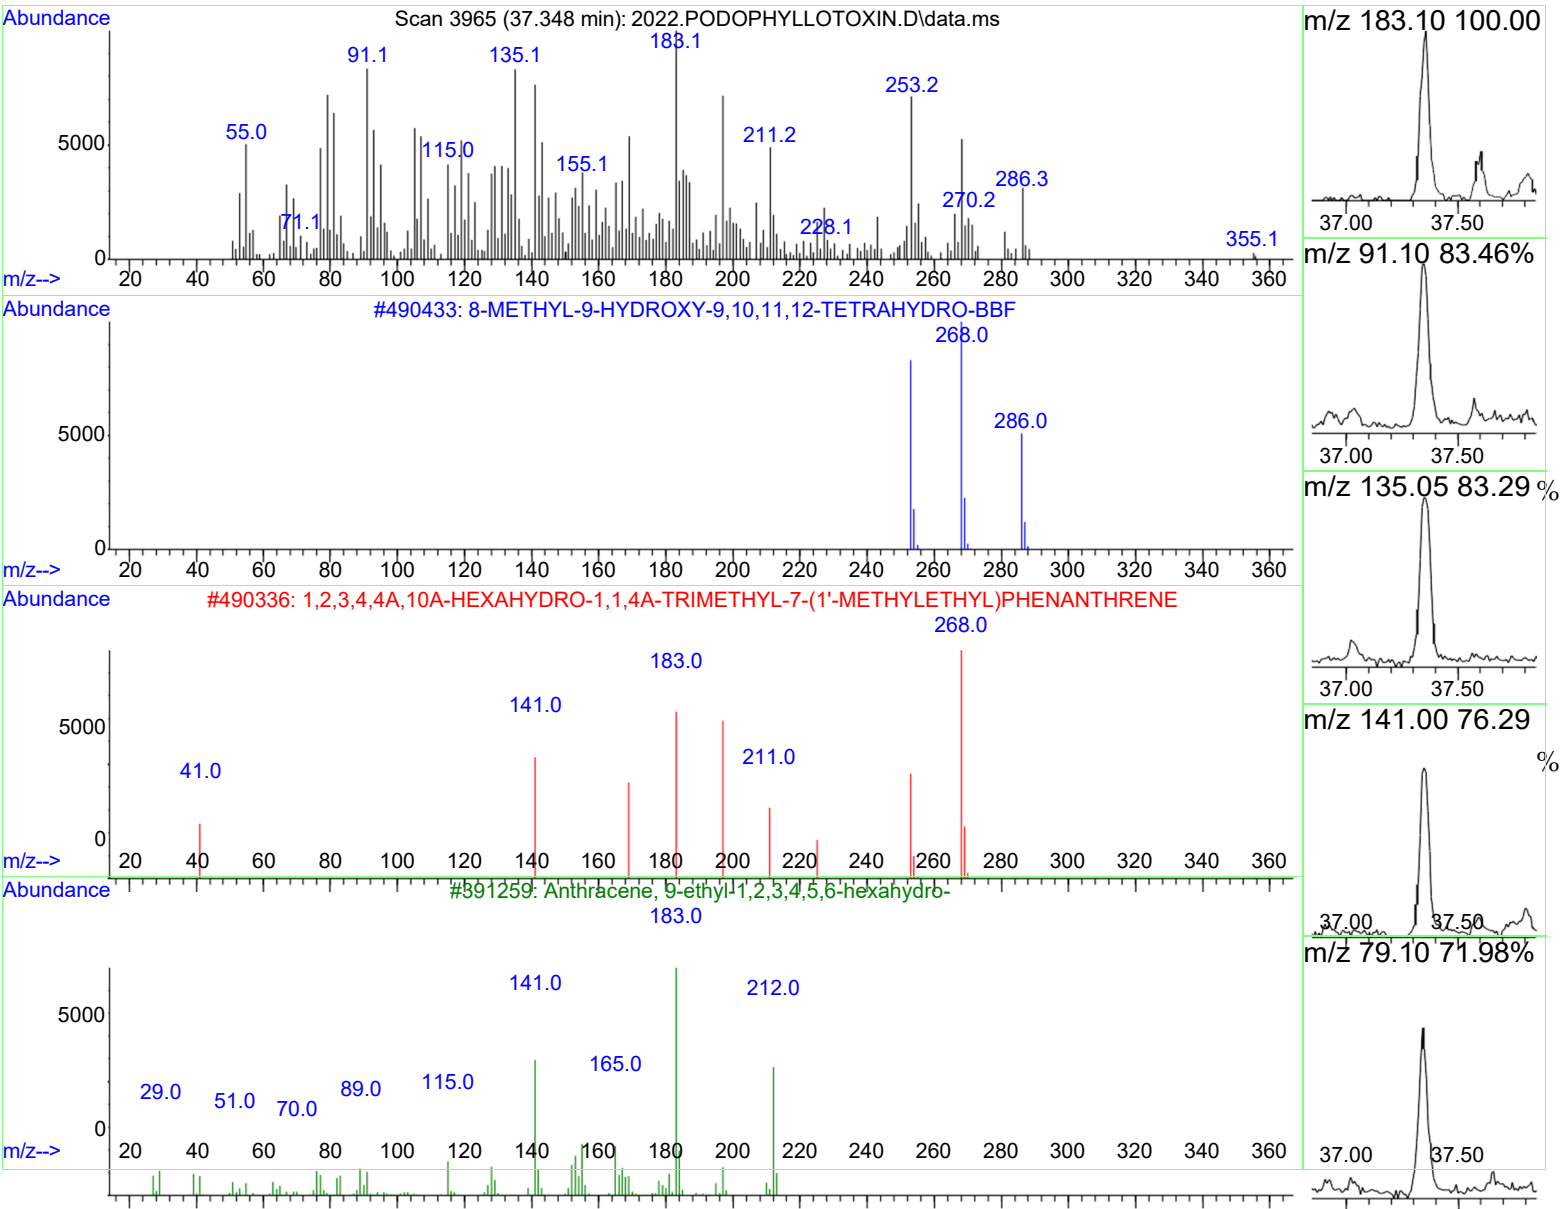

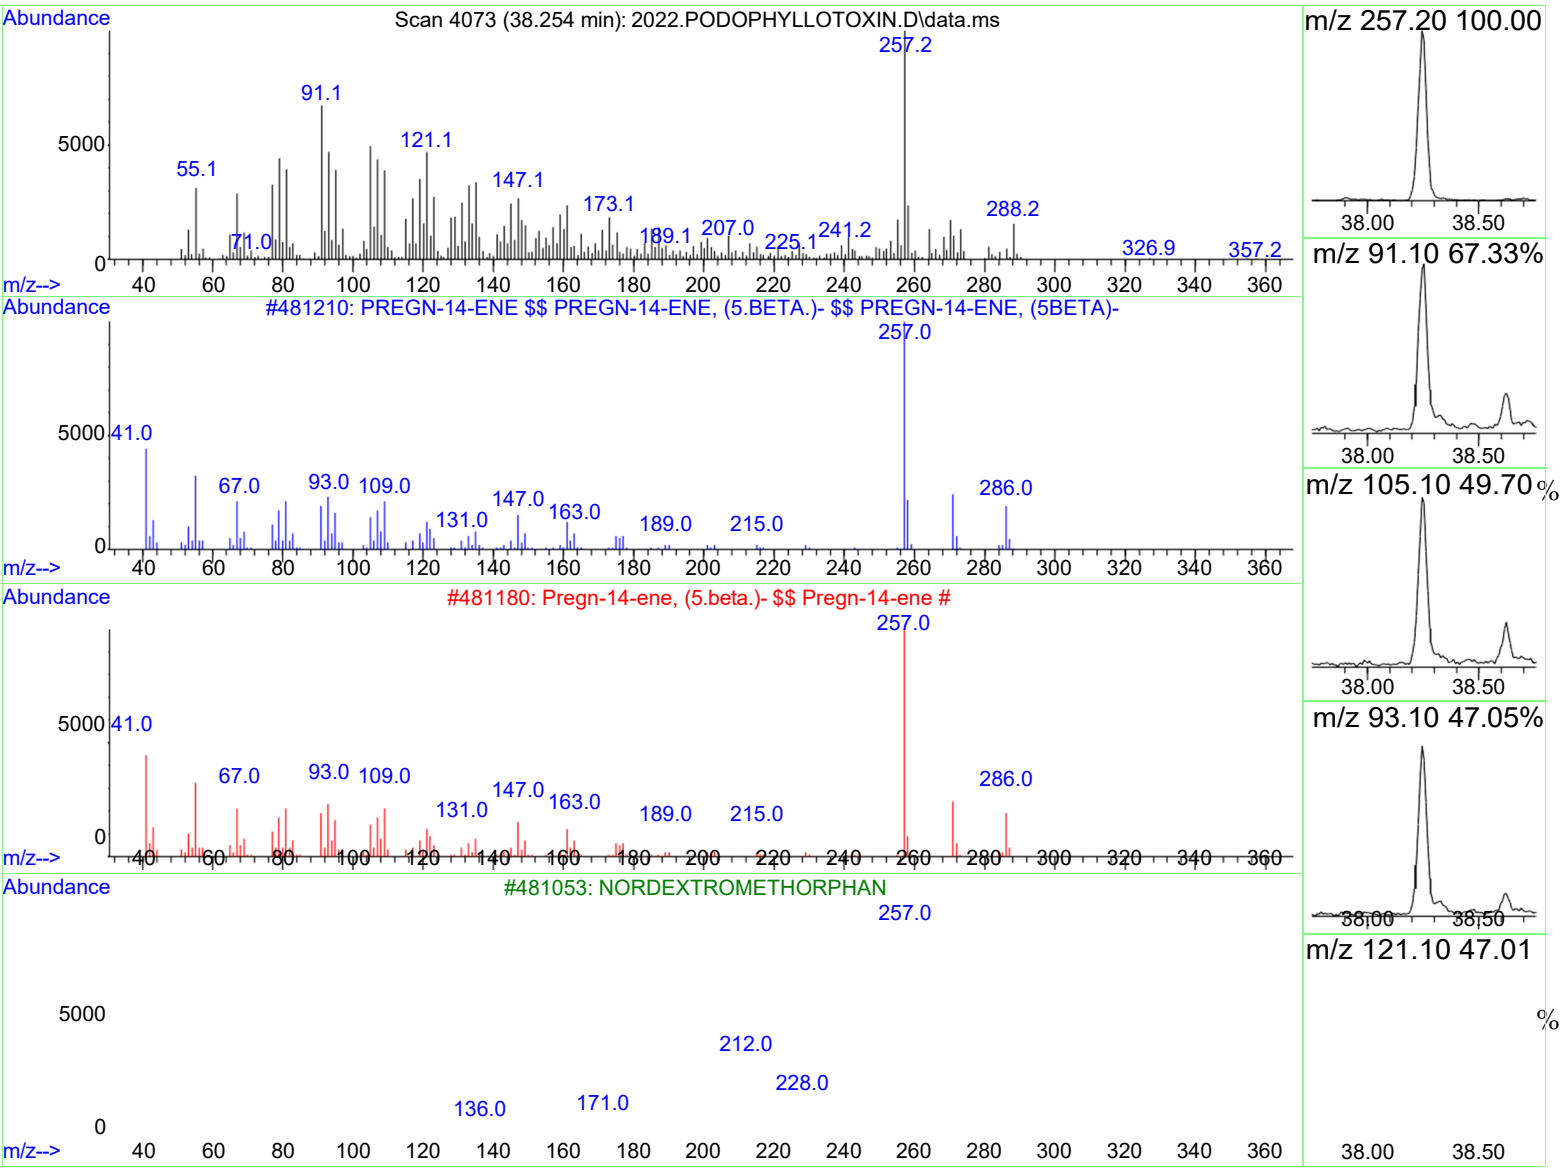

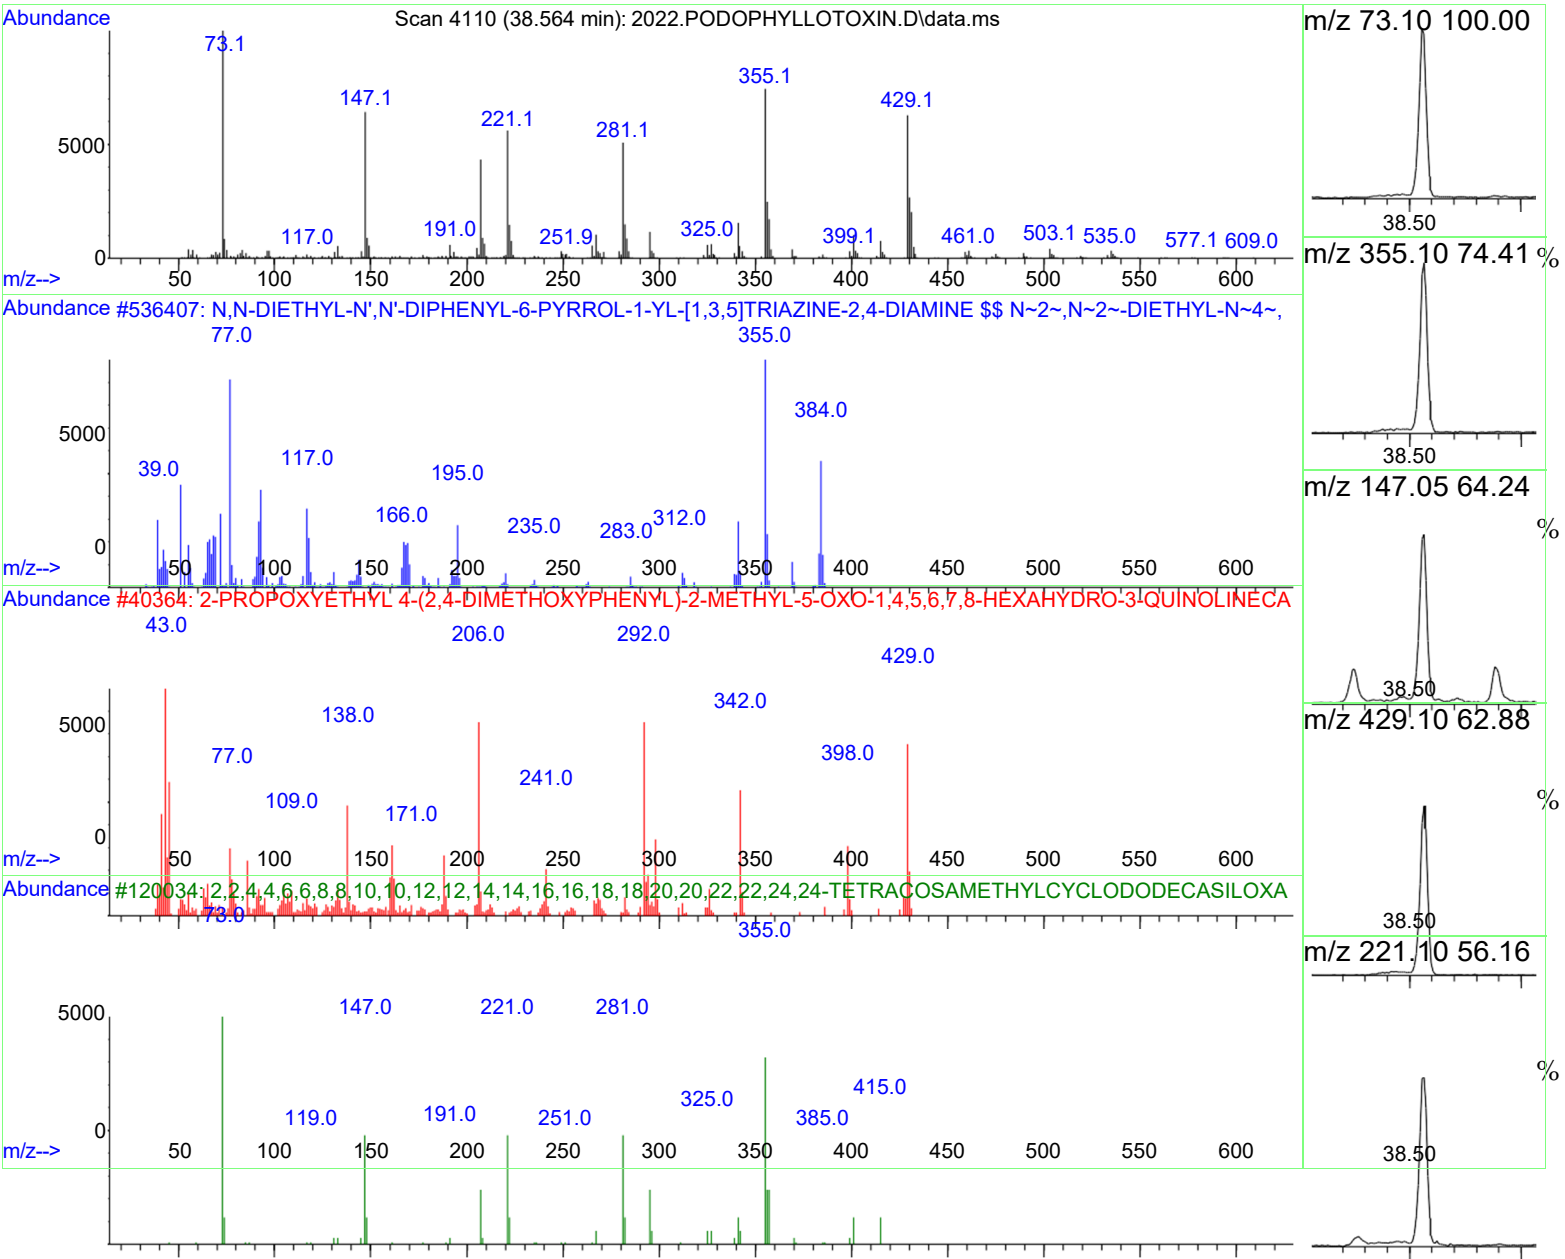

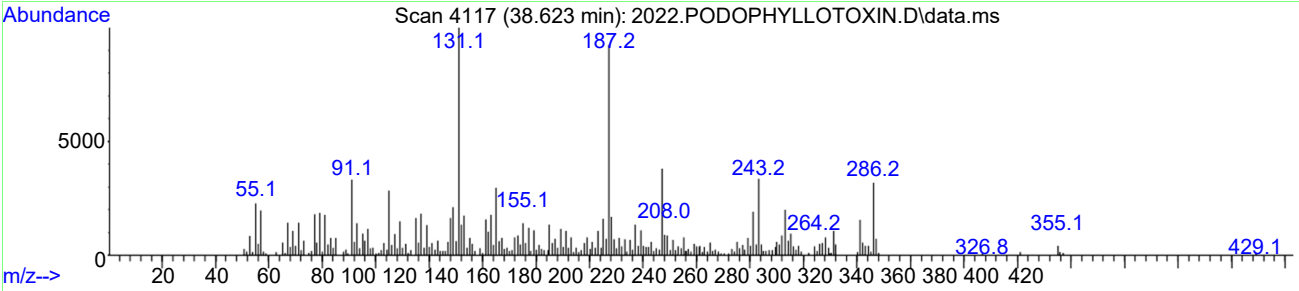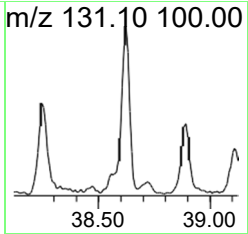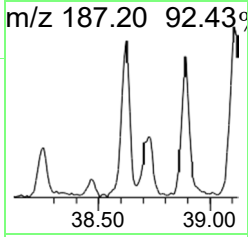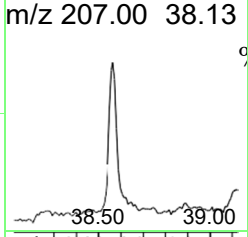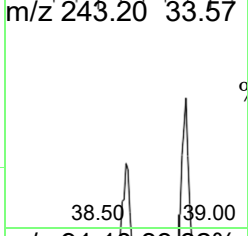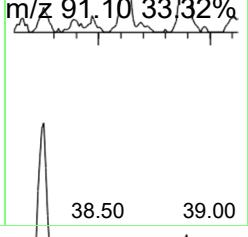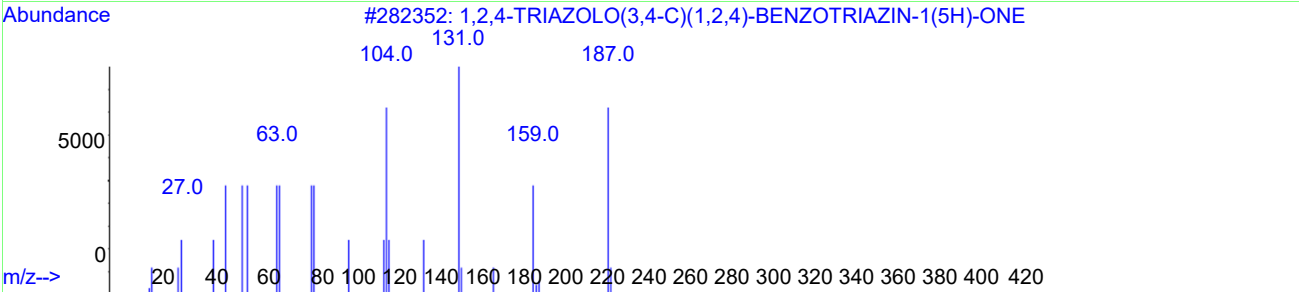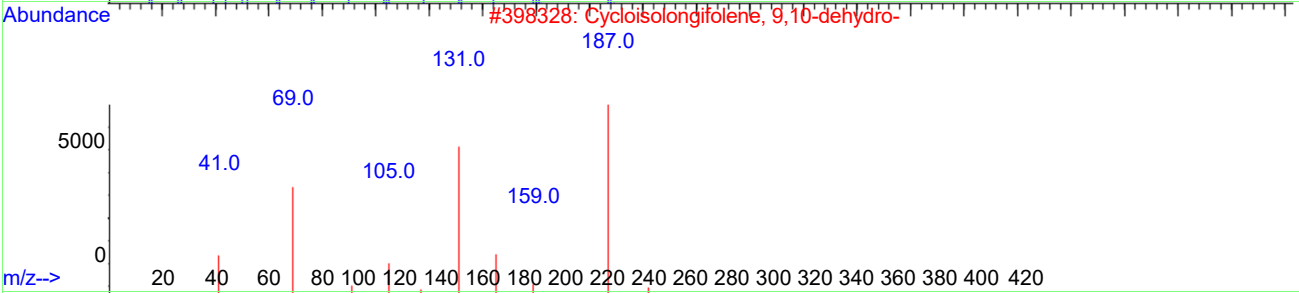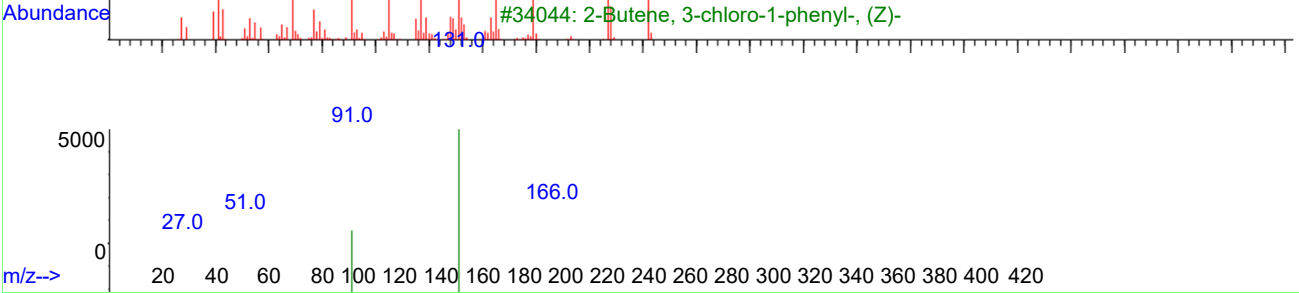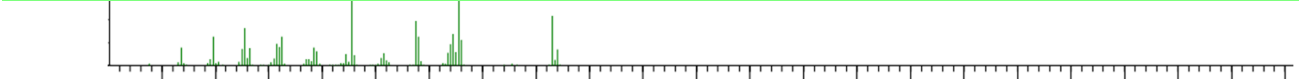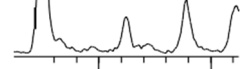

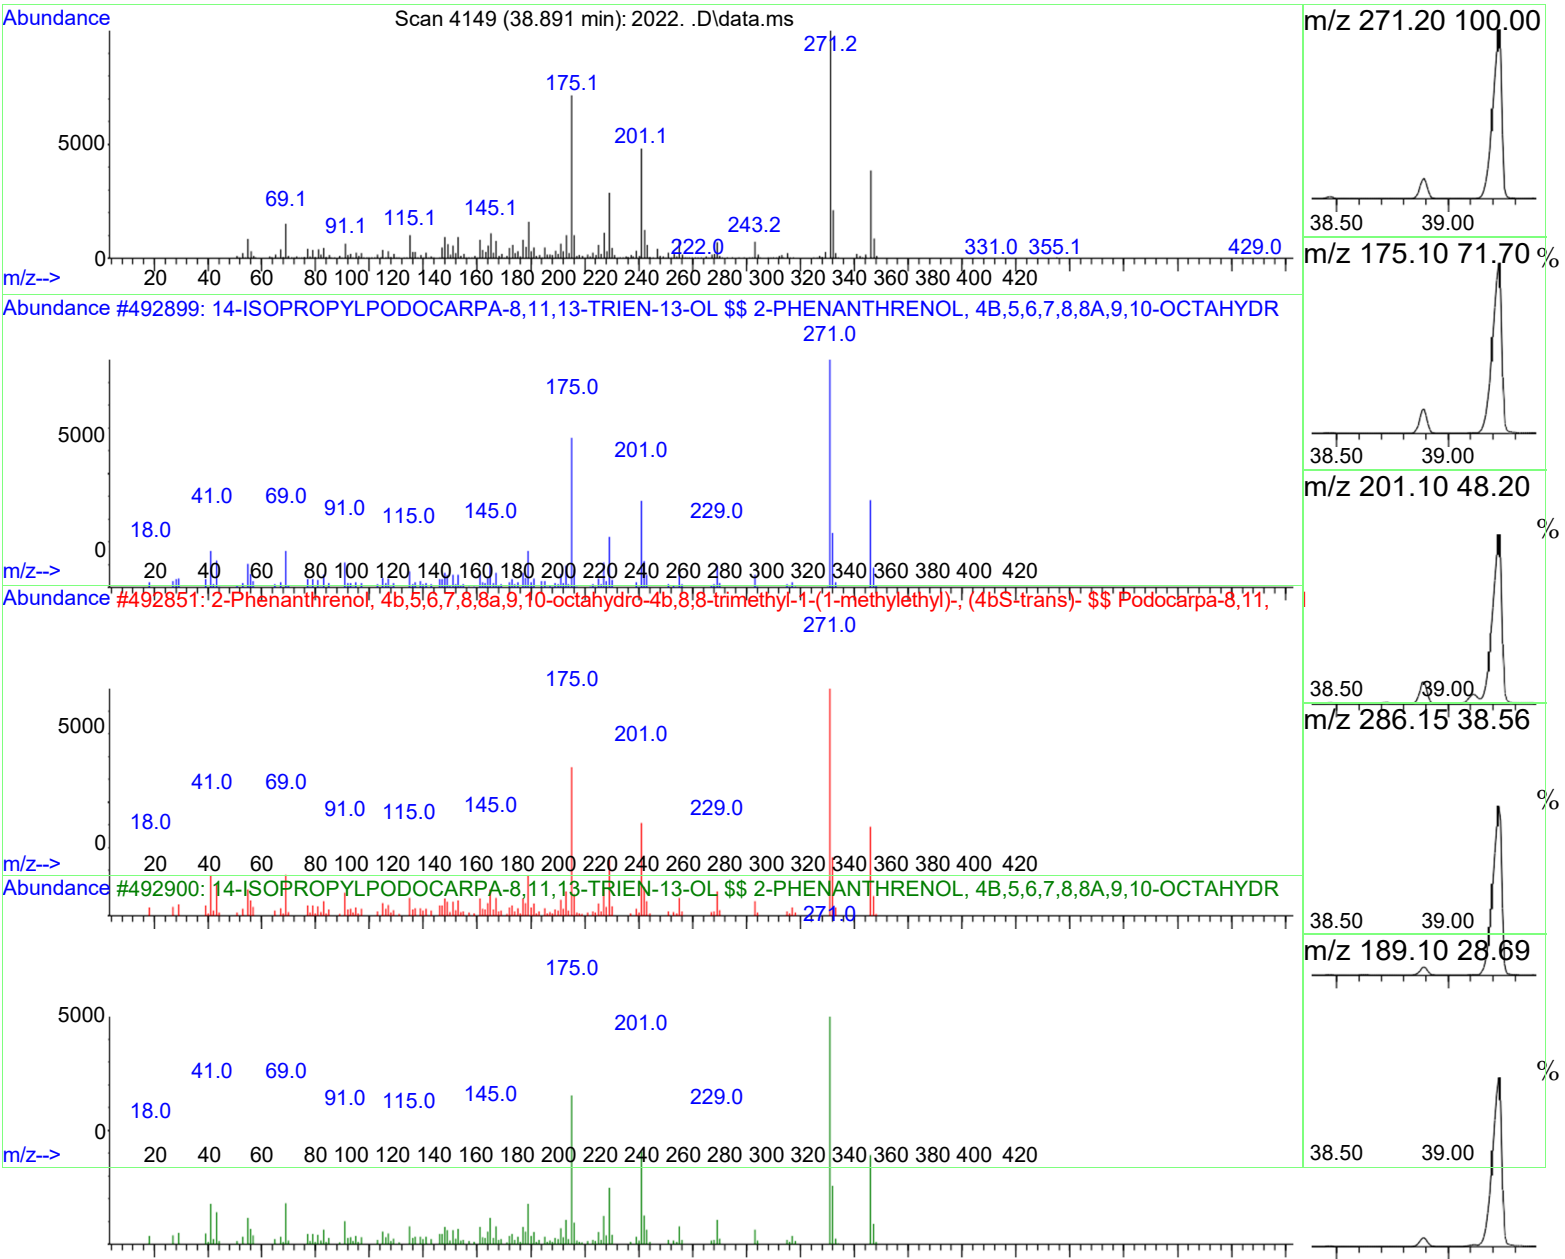

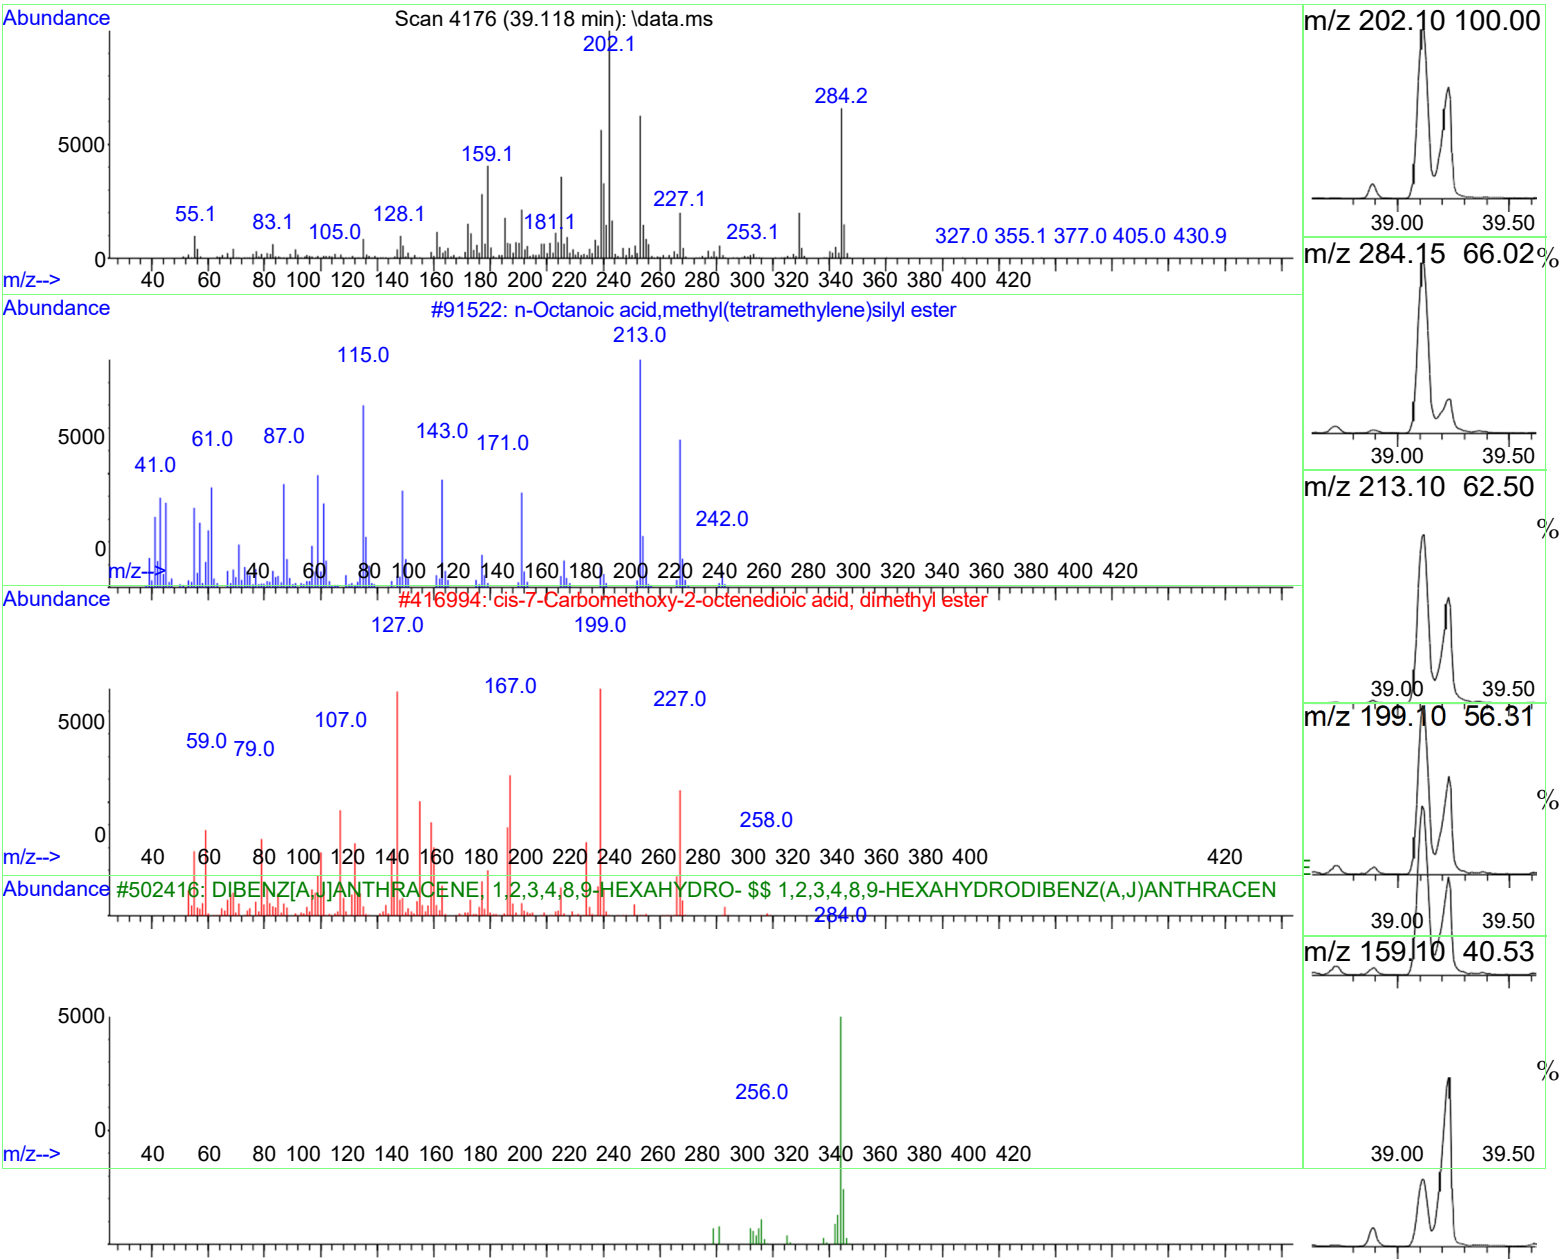

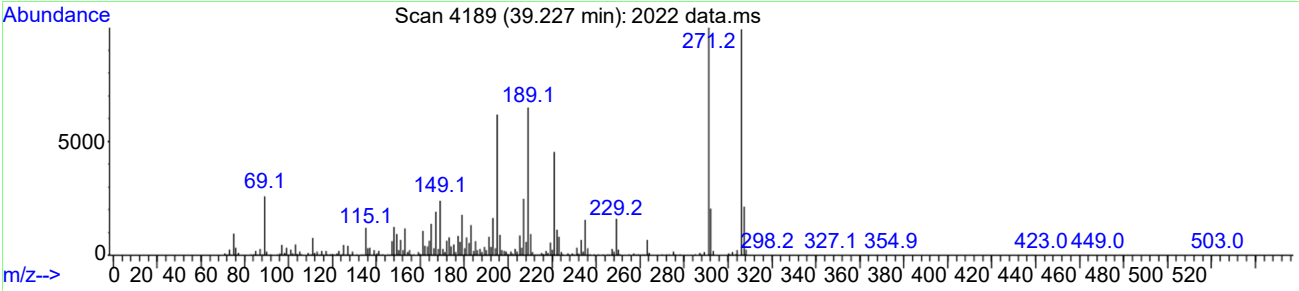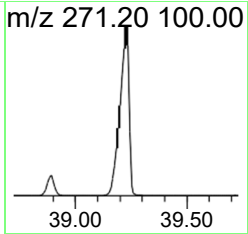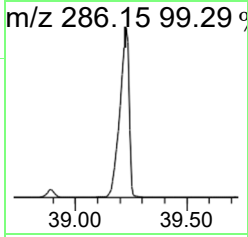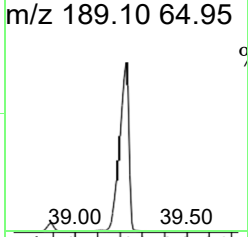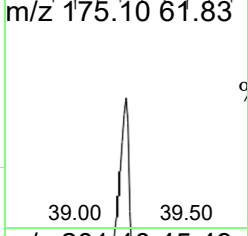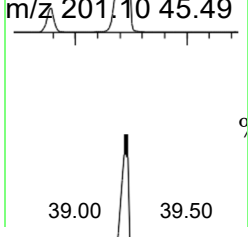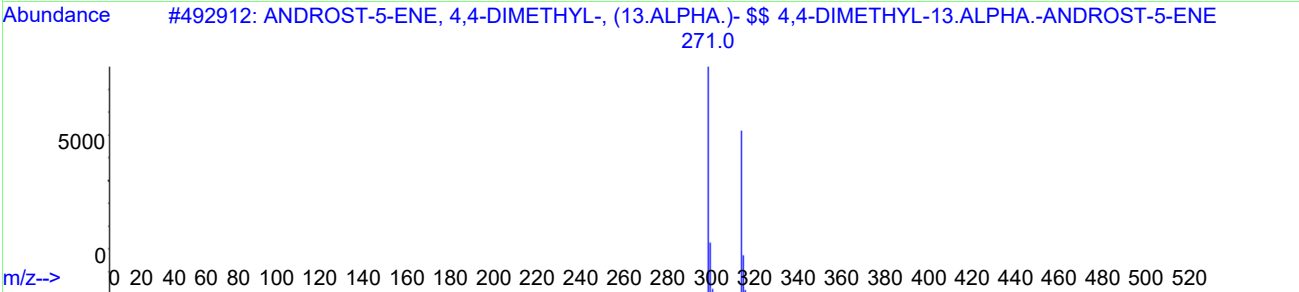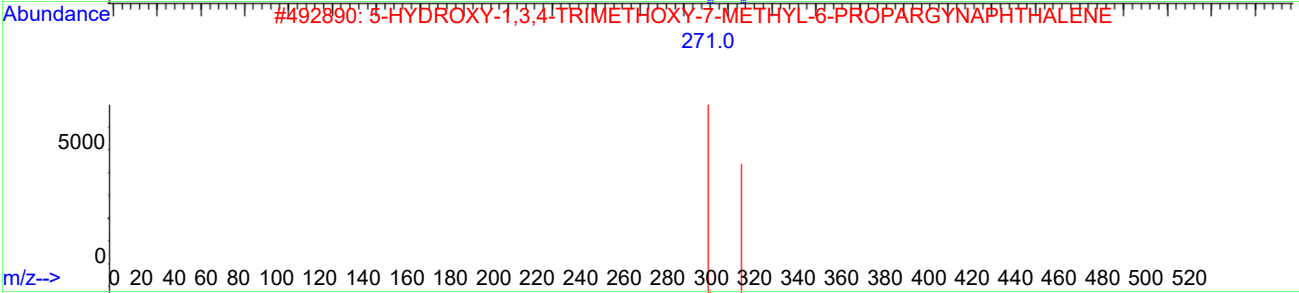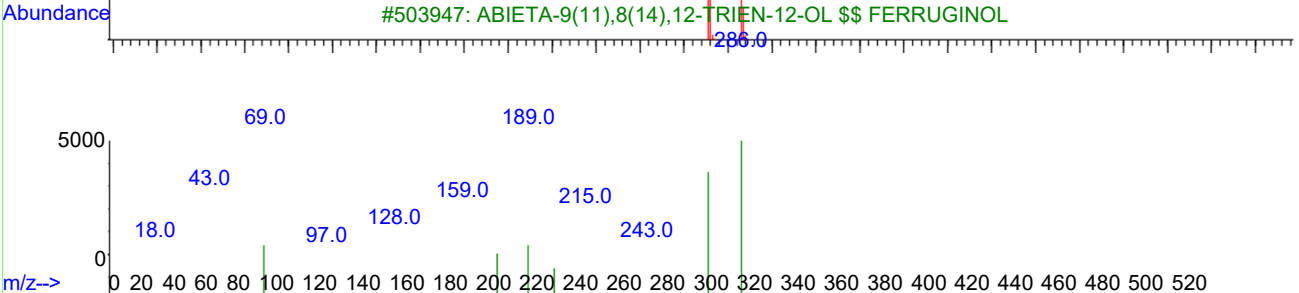

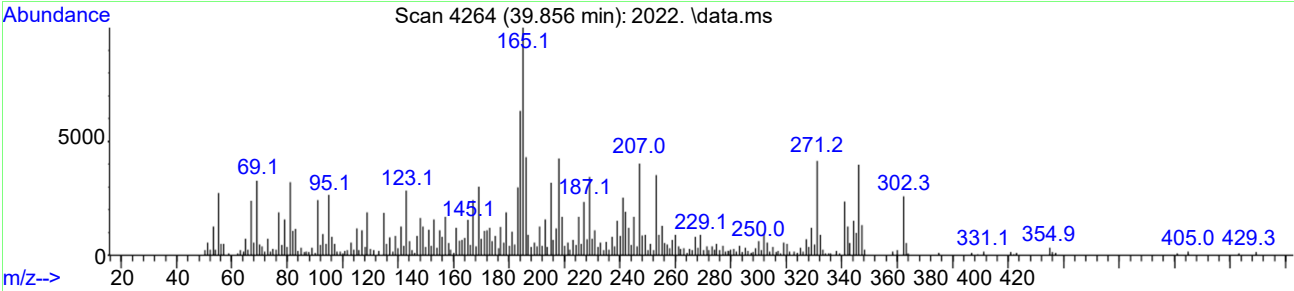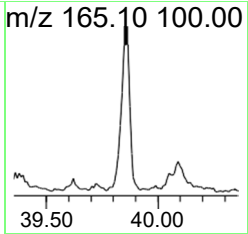

m/z 164.00 63.42 %

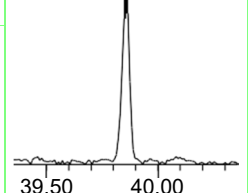

m/z 166.10 43.18 %

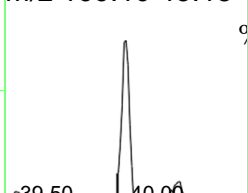

m/z 178.00 42.74 %

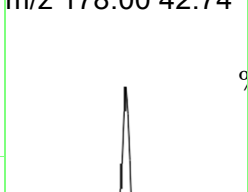

m/z 271.15 41.39 %

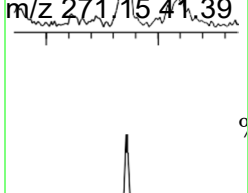

m/z 271.15 41.39 %

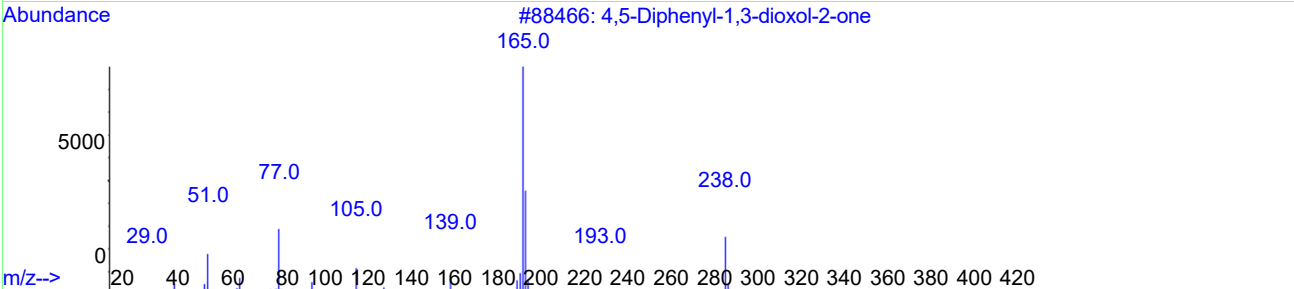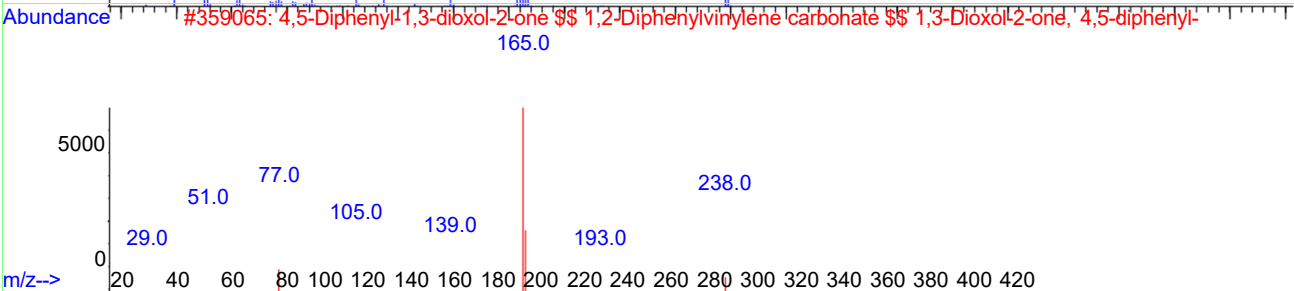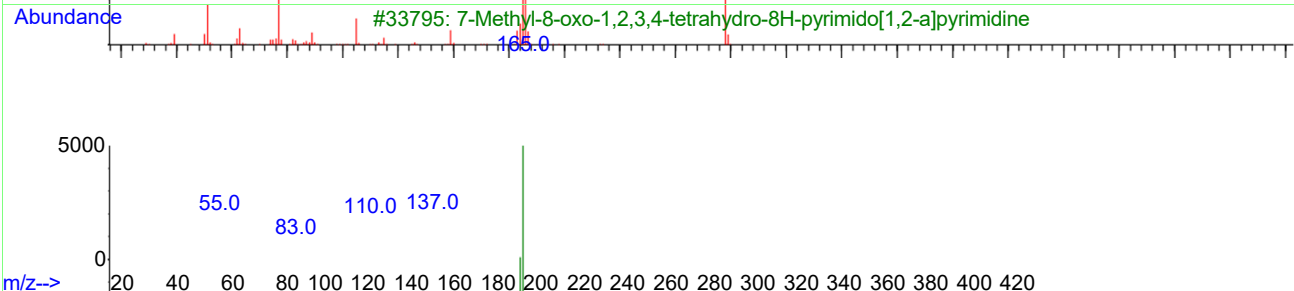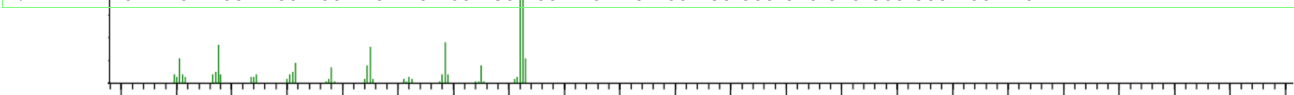

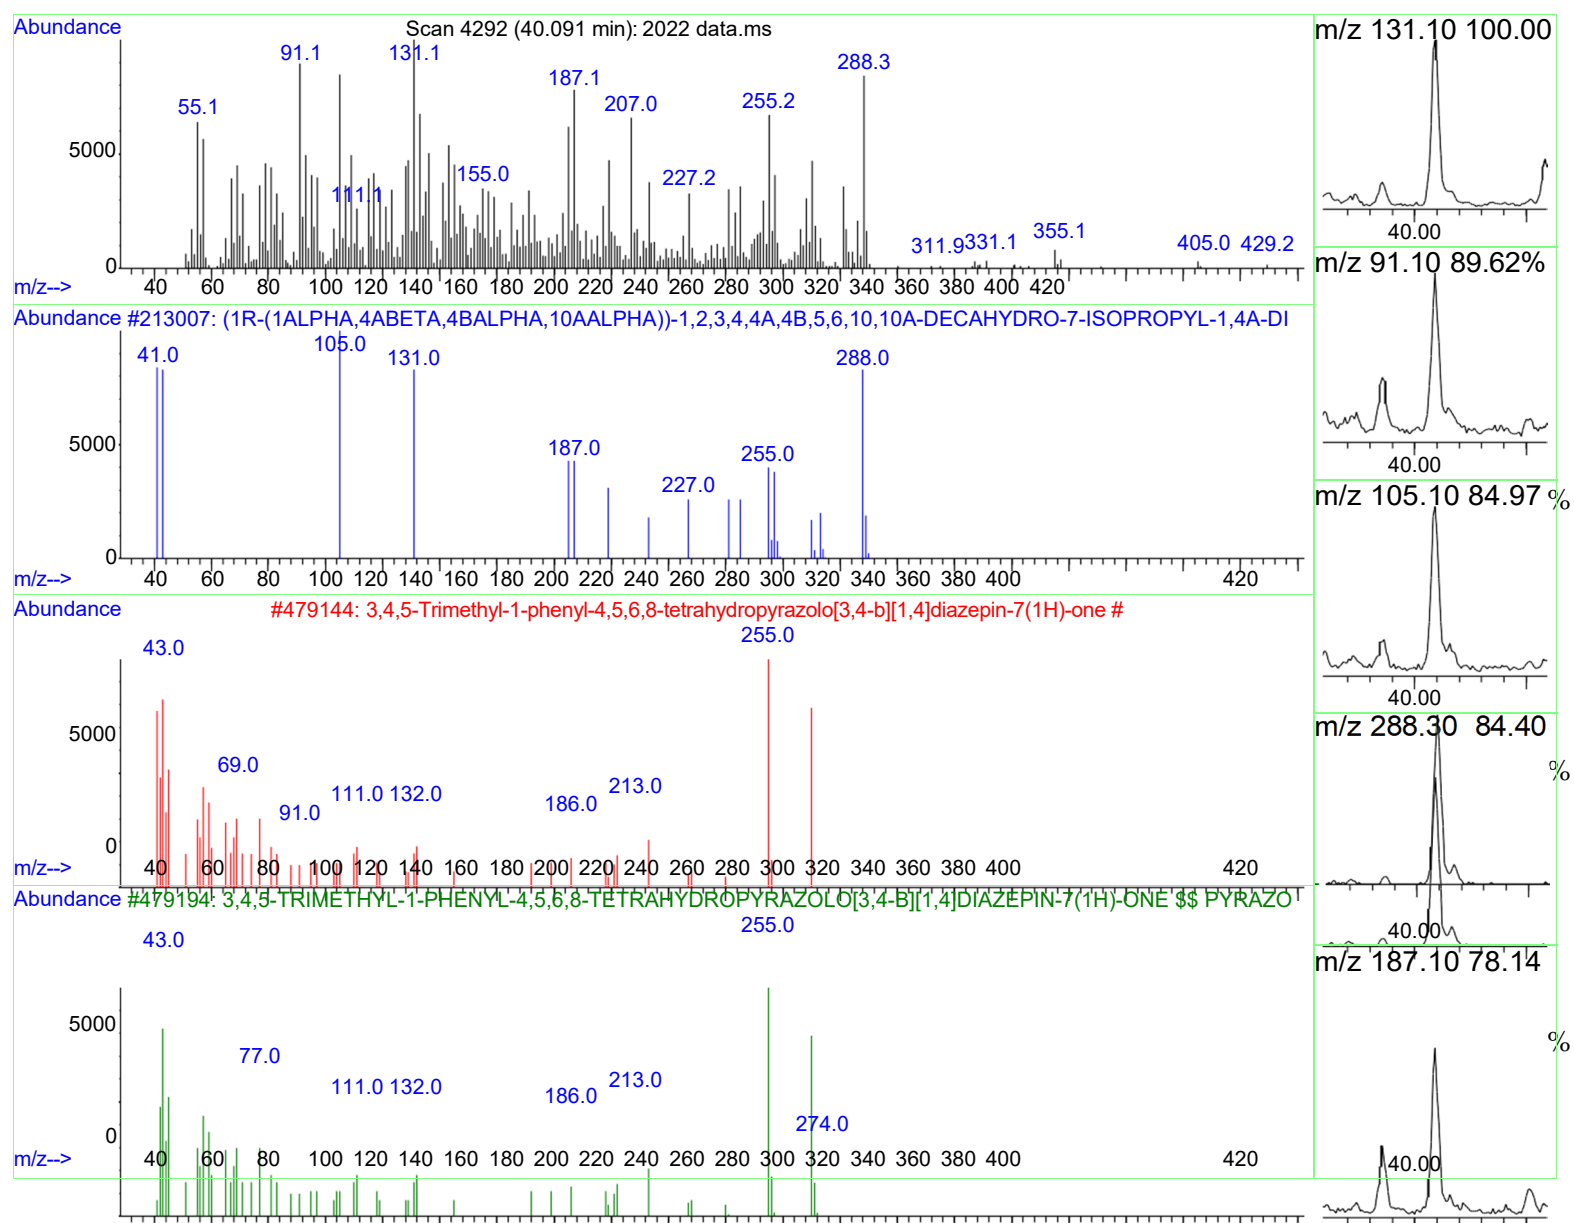

**Figure S1.** Mass spectrum of identified. phytochemical compounds from leaf extract of *Juniperus procera*.
